# Supplementary material for: One Step Synthesis of Tetragonal-CuBi2O4/Amorphous-BiFeO3 Heterojunction with Improved Charge Separation and Enhanced Photocatalytic Properties
Source: PubMed Central journal article supplement (PMC7466469; doi:10.3390/nano10081514), 2020-08-01
Supplement: nanomaterials-10-01514-s001.pdf [file nanomaterials-10-01514-s001.pdf]

## Supplementary Materials

# One step synthesis of tetragonal-CuBi<sub>2</sub>O<sub>4</sub>/amorphous-BiFeO<sub>3</sub> heterojunction with improved charge separation and enhanced photocatalytic properties

Fang Cai<sup>1,2,†</sup>, Ting Zhang<sup>1,3,†</sup>, Qiong Liu<sup>4</sup>, Pengran Guo<sup>1,2</sup>, Yongqian Lei<sup>1,2</sup>, Yi Wang<sup>3</sup> and Fuxian Wang<sup>1,4\*</sup>

<sup>1</sup> Guangdong Provincial Key Laboratory of Emergency Test for Dangerous Chemicals, Guangdong Institute of Analysis, Guangdong Academy of Sciences, Guangzhou 510070, China;

<sup>2</sup> Guangdong Engineering Technology Research Center of On-line Monitoring of Water Environmental Pollution, Guangdong Institute of Analysis, Guangdong Academy of Sciences, Guangzhou 510070, China;

<sup>3</sup> College of Petrochemical Technology, Lanzhou University of Technology, Lanzhou 730050, China;

<sup>4</sup> State Key Laboratory of Pulp and Paper Engineering, South China University of Technology, Guangzhou 510641, China;

\* Correspondence: [wangfuxian@fenxi.com.cn](mailto:wangfuxian@fenxi.com.cn) (F.W.)

† These authors contributed equally to this work

Table S1 details for the preparation of solvothermal solutions with various ion ratios.

| T-CBO/A-BFO ratio | Stock solution for each ion                                     | n (mol) | V(ml) | C(mol/l) |
|-------------------|-----------------------------------------------------------------|---------|-------|----------|
| 1:4               | BiN <sub>3</sub> O <sub>9</sub> in acetic acid                  | 0.00144 | 3.6   | 0.4      |
|                   | Cu(NO <sub>3</sub> ) <sub>2</sub> ·3H <sub>2</sub> O in ethanol | 0.00024 | 6     | 0.04     |
|                   | Fe(NO <sub>3</sub> ) <sub>3</sub> ·9H <sub>2</sub> O in ethanol | 0.00096 | 24    | 0.04     |
| 1:2               | BiN <sub>3</sub> O <sub>9</sub> in acetic acid                  | 0.0016  | 4     | 0.4      |
|                   | Cu(NO <sub>3</sub> ) <sub>2</sub> ·3H <sub>2</sub> O in ethanol | 0.0004  | 10    | 0.04     |
|                   | Fe(NO <sub>3</sub> ) <sub>3</sub> ·9H <sub>2</sub> O in ethanol | 0.0008  | 20    | 0.04     |
| 1:1               | BiN <sub>3</sub> O <sub>9</sub> in acetic acid                  | 0.0018  | 4.5   | 0.4      |
|                   | Cu(NO <sub>3</sub> ) <sub>2</sub> ·3H <sub>2</sub> O in ethanol | 0.0006  | 15    | 0.04     |
|                   | Fe(NO <sub>3</sub> ) <sub>3</sub> ·9H <sub>2</sub> O in ethanol | 0.0006  | 15    | 0.04     |
| 2:1               | BiN <sub>3</sub> O <sub>9</sub> in acetic acid                  | 0.002   | 5     | 0.4      |
|                   | Cu(NO <sub>3</sub> ) <sub>2</sub> ·3H <sub>2</sub> O in ethanol | 0.0008  | 20    | 0.04     |
|                   | Fe(NO <sub>3</sub> ) <sub>3</sub> ·9H <sub>2</sub> O in ethanol | 0.0004  | 10    | 0.04     |
| 3:1               | BiN <sub>3</sub> O <sub>9</sub> in acetic acid                  | 0.0021  | 5.25  | 0.4      |
|                   | Cu(NO <sub>3</sub> ) <sub>2</sub> ·3H <sub>2</sub> O in ethanol | 0.0009  | 22.5  | 0.04     |
|                   | Fe(NO <sub>3</sub> ) <sub>3</sub> ·9H <sub>2</sub> O in ethanol | 0.0003  | 7.5   | 0.04     |
| 4:1               | BiN <sub>3</sub> O <sub>9</sub> in acetic acid                  | 0.00216 | 5.4   | 0.4      |
|                   | Cu(NO <sub>3</sub> ) <sub>2</sub> ·3H <sub>2</sub> O in ethanol | 0.00096 | 24    | 0.04     |
|                   | Fe(NO <sub>3</sub> ) <sub>3</sub> ·9H <sub>2</sub> O in ethanol | 0.00024 | 6     | 0.04     |

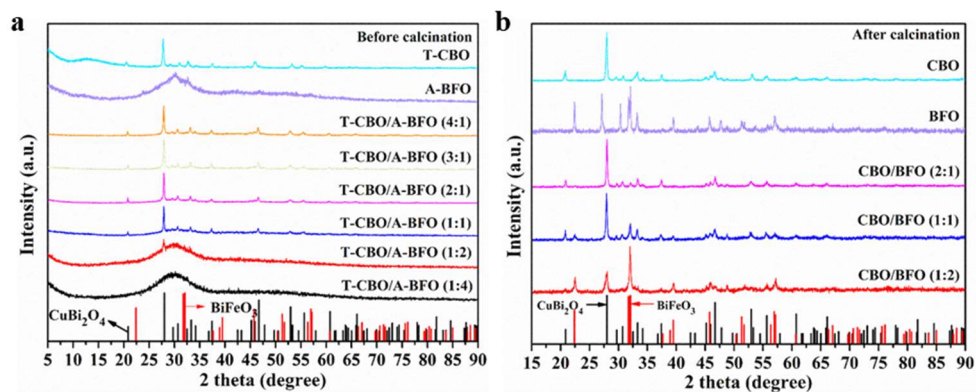

Figure S1 XRD patterns of the T-CBO, A-BFO and T-CBO/A-BFO composites (a) before annealing; (b) after annealing at 450 °C for 2 h.

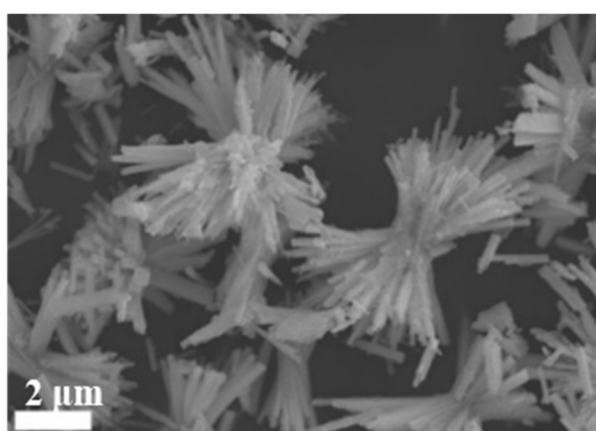

Figure S2. SEM images of the T-CBO.

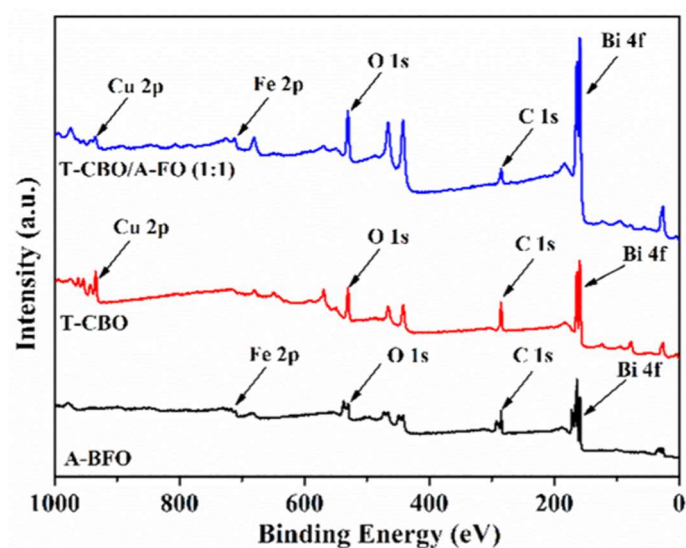

Figure S3. XPS survey spectra of Cu 2p, Fe 2p, O 1s, Bi 4f of the T-CBO, A-BFO and T-CBO/A-BFO (1:1).

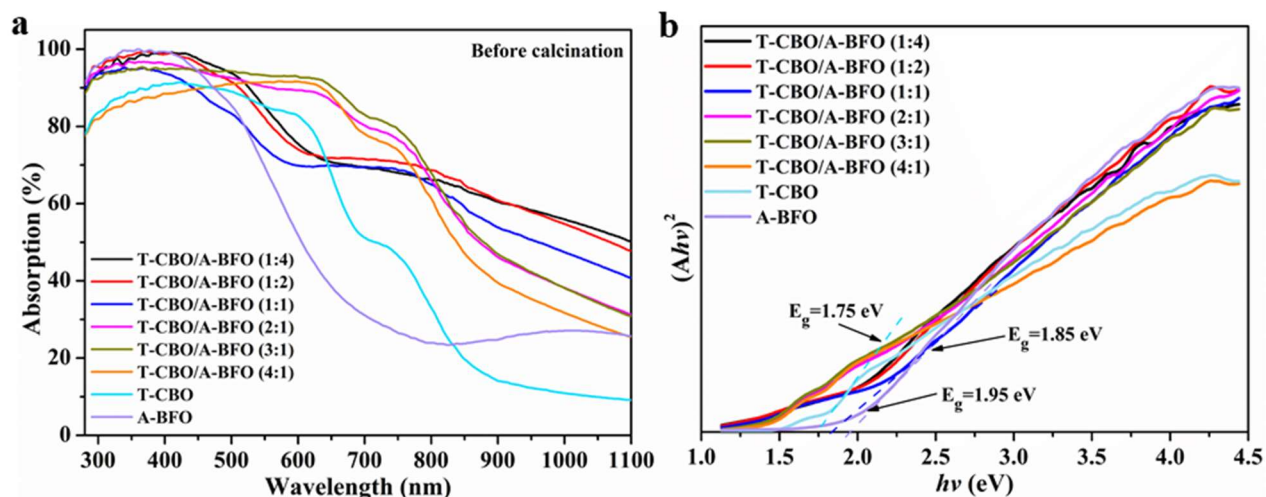

Figure S4. (a) UV-vis diffuse reflectance spectra; (b) corresponding Tauc plots of the T-CBO, A-BFO and T-CBO/A-BFO composites.

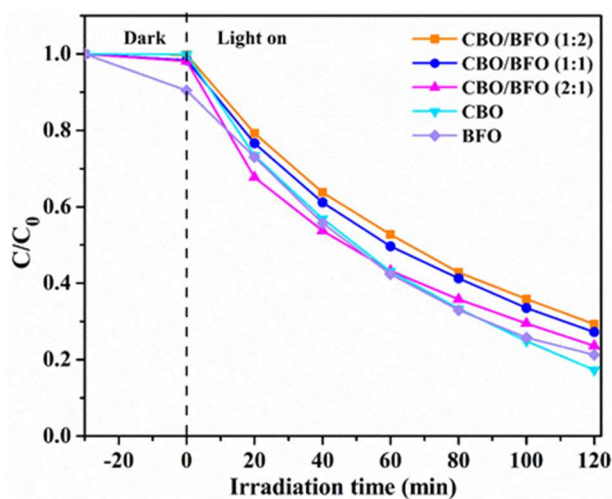

Figure S5. Photodegradation of MB by post annealed CBO, BFO and CBO/BFO composites.

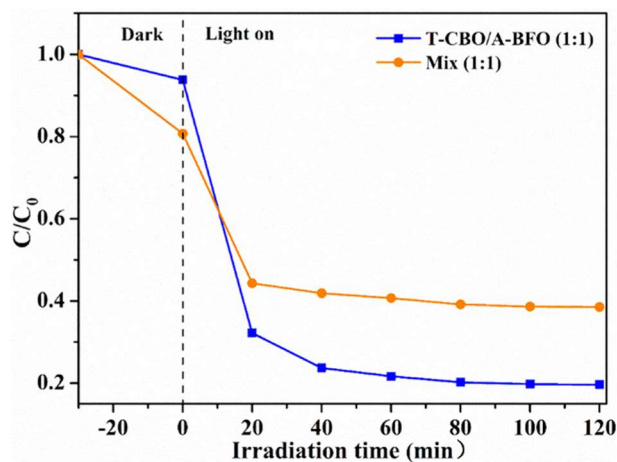

Figure S6. Photodegradation of MO by T-CBO/A-BFO (1:1) and the physically mixed T-CBO and A-BFO at a ratio of 1:1.
